# Supplementary material for: Low-temperature N-anchored ordered Pt3Co intermetallic nanoparticles as electrocatalysts for methanol oxidation reaction
Source: Royal Society of Chemistry journal article supplement (doi:10.1039/d2nr04316e), 2022-01-01
Supplement: d2nr04316e1.pdf [file d2nr04316e1.pdf]

## Supporting Information

# Low-temperature N-anchored ordered Pt<sub>3</sub>Co intermetallic nanoparticles as electrocatalysts for methanol oxidation reaction

*Yanru Li<sup>a, b, ‡</sup>, Hongwei Li<sup>a, b, ‡</sup>, Guixian Li<sup>a, b</sup>, Dongliang Wang<sup>a, b</sup>, Shoudeng Wang<sup>a, b</sup>, Xinhong  
Zhao<sup>a, b, \*</sup>*

a School of Petrochemical Technology, Lanzhou University of Technology, Lanzhou, 730050,  
China

b Key Laboratory of Low Carbon Energy and Chemical Engineering of Gansu Province,  
Lanzhou, 730050, China

\* Corresponding author: College of Petrochemical Technology, Lanzhou University of  
Technology, 36 Pengjiaping Road, Lanzhou, Gansu Province, 730050, China. E-mail:

[licpzhaoxh@lu126.com](mailto:licpzhaoxh@lu126.com) (XH. Zhao)

‡ Yanru Li and Hongwei Li contributed equally to this paper

## DFT Computational Method

The DFT calculations were conducted based on the Vienna Ab-initio Simulation Package (VASP)<sup>[1, 2]</sup>. The electron-ion interactions were described by the Projected Augmented-Wave (PAW) potentials, while the exchange-correlation interactions were calculated by employing the Perdew-Burke-Ernzerhof (PBE) pseudopotentials of Generalized Gradient Approximation (GGA)<sup>[3, 4]</sup>. The PAW and PBE exchange-correlation functional supplied with the VASP package were employed for C ( $2s^2 2p^2$  08Apr2002), N ( $2s^2 2p^3$  08Apr2002), Pt ( $5d^9 6s^1$  04Feb2005) and Co ( $3d^7 4s^2$  02Aug2007). For structural optimization, the kinetic energy cutoff of the plane wave basis set was chosen to be 520 eV and the Brillouin zone integration is performed with  $2 \times 2 \times 1$  k points. An energy tolerance of  $1.0 \times 10^{-6}$  eV, and a maximum displacement of  $1.0 \times 10^{-2}$  Å were considered.

The vdW-D3 method developed by Grimme was employed to describe the van der Waals interaction<sup>[5]</sup>. The plane-wave energy cutoff was set as 520 eV. The convergence threshold was set as  $1.0 \times 10^{-6}$  eV in energy and 0.01 eV per Angstrom in force. A four-layer face centered cubic structure of the Pt (111) or Pt<sub>3</sub>Co (111) was adopted in which the lattice constant was chosen from Materials Project<sup>[6]</sup>. A vacuum layer of 15 Å was adopted to avoid the periodic interactions and the bottom two layers were fixed in order to increase the calculation efficiency. The Brillouin zone was modeled by gamma centered Monkhorst-Pack scheme, in which a  $3 \times 3 \times 1$  grid was adopted. Each electrochemical reaction step of methanol oxidation involves a ( $H^+ + e^-$ ) pair transfer from the adsorbed species on the surface to the electrolyte.

The change in the Gibbs free energy of each ( $H^+ + e^-$ ) pair transfer reaction was calculated by computational hydrogen electrode (CHE) model:

$$\Delta G = \Delta E_{\text{pot}} + \Delta E_{\text{ZPE}} - T \Delta S$$

In which the  $\Delta E_{\text{pot}}$ ,  $\Delta E_{\text{ZPE}}$  and the  $\Delta S$  were referred to as the change in potential energy, the change in the zero-point energy and the change in the entropy.

The zero-point energy was calculated by the summation of all vibrational frequencies:

$$E_{\text{ZPE}} = \frac{1}{2} \sum h\nu$$

where the  $\nu$  corresponded to the vibrational frequency of each normal mode[7].

## References

- [1] Kresse G, Furthmüller J. Efficiency of ab-initio total energy calculations for metals and semiconductors using a plane-wave basis set. *Comp. Mater. Sci.* **1996**, 6, 15-50.
- [2] Kresse G, Furthmüller J. Efficient iterative schemes for ab initio total-energy calculations using a plane-wave basis set. *Phys. Rev. B.* **1996**, 54, 11169-11186.
- [3] Blöchl PE. Projector augmented-wave method. *Phys. Rev. B.* 50 (**1994**) 17953-17979.
- [4] Perdew JP, Burke K, Ernzerhof M. Generalized Gradient Approximation Made Simple [*Phys. Rev. Lett.* 77, 3865 (1996)]. *Phys. Rev. Lett.* **1997**, 78, 1396-1396.
- [5] Grimme S, Antony J, Ehrlich S, et al. A consistent and accurate ab initio parametrization of density functional dispersion correction (DFT-D) for the 94 elements H-Pu. *J. Chem. Phys.*, **2010**, 132, 154104.

[6] Jain A, Ong S P, Hautier G, et al. Commentary: The Materials Project: A materials genome approach to accelerating materials innovation. *APL materials*, **2013**, 1, 011002.

[7] Li Y, Chan S H, Sun Q. Heterogeneous catalytic conversion of CO<sub>2</sub>: a comprehensive theoretical review. *Nanoscale*. **2015**, 7, 8663-8683.

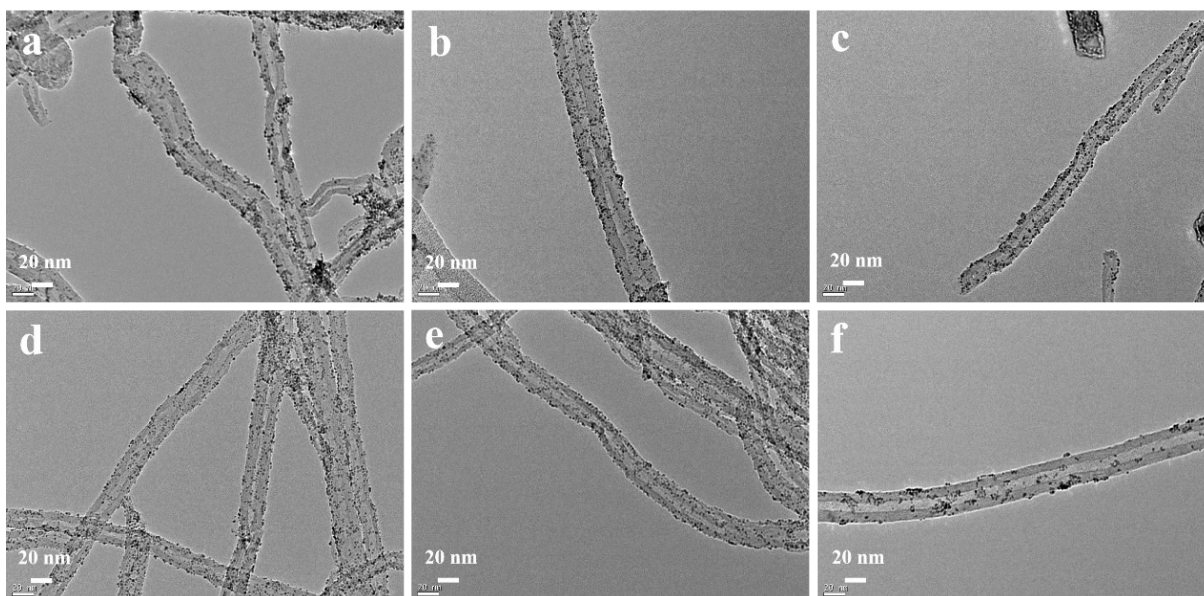

**Figure S1.** Different TEM images of a) Pt<sub>3</sub>Co/N-CNT-U, b) Pt<sub>3</sub>Co/N-CNT-M, c) Pt<sub>3</sub>Co/N-CNT-P, d) Pt<sub>3</sub>Co/N-CNT-T, e) Pt<sub>3</sub>Co/N-CNT-H, and f) Pt<sub>3</sub>Co/CNTs.

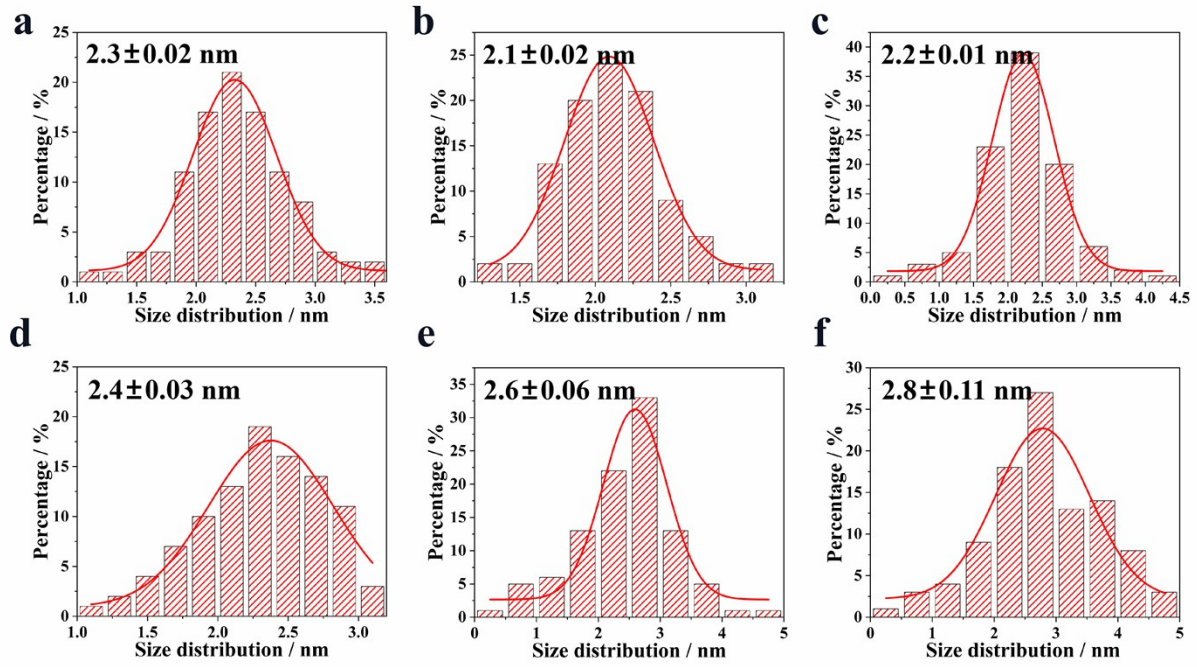

**Figure S2.** Particle size distribution histograms of Pt<sub>3</sub>Co supported on a) N-CNT-U, b) N-CNT-M, c) N-CNT-P, d) N-CNT-T, e) N-CNT-H, and f) CNTs.

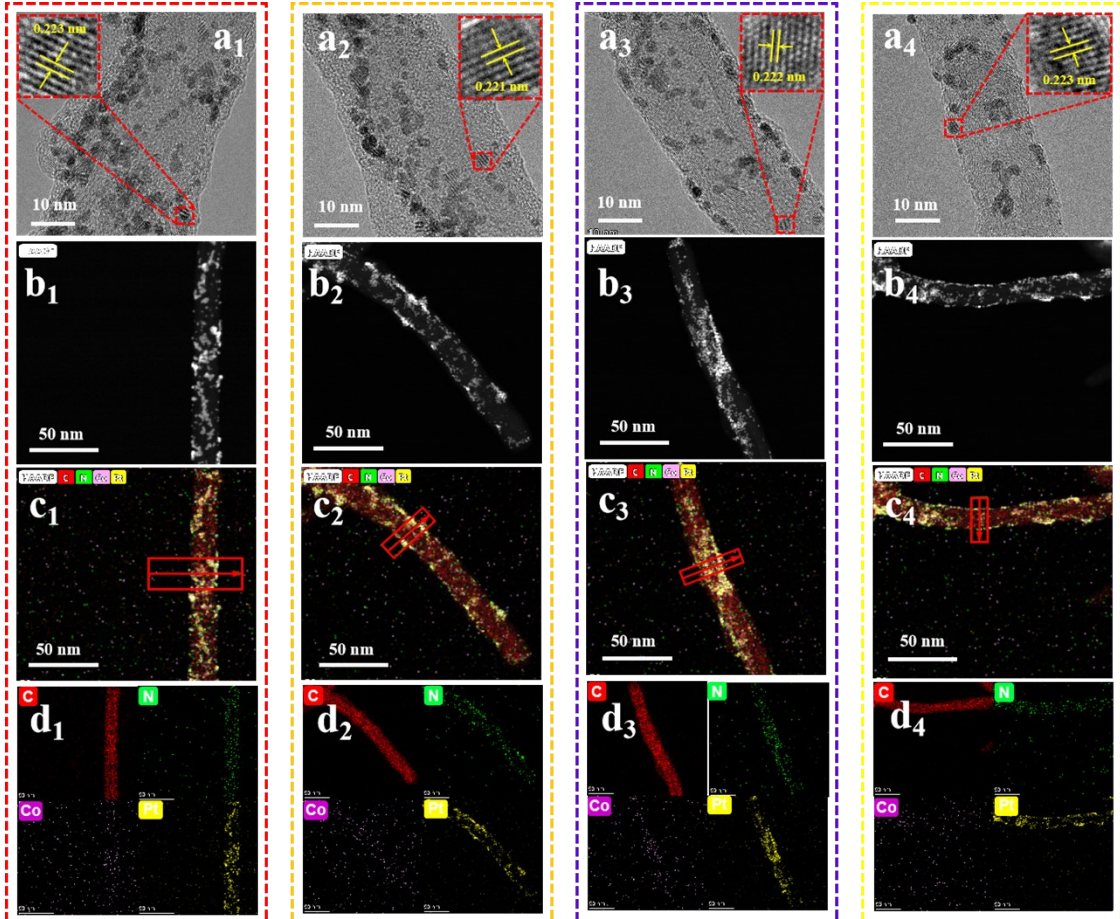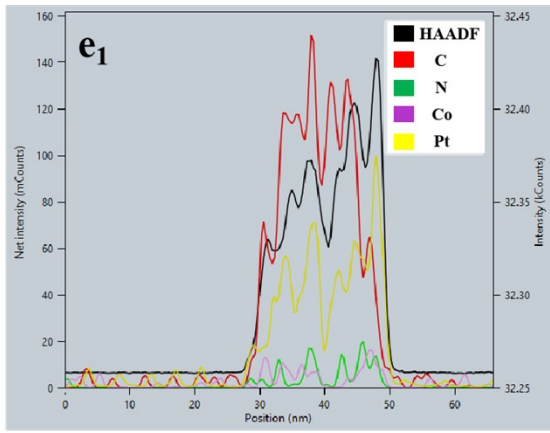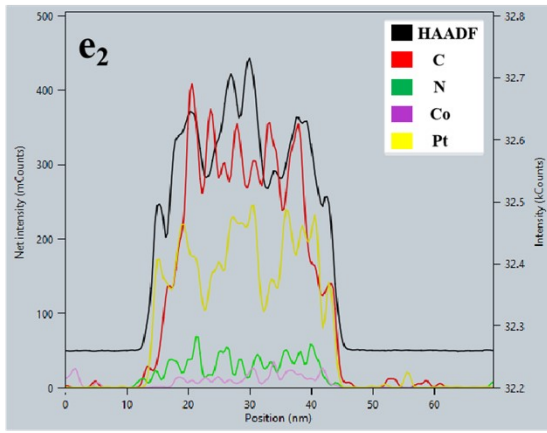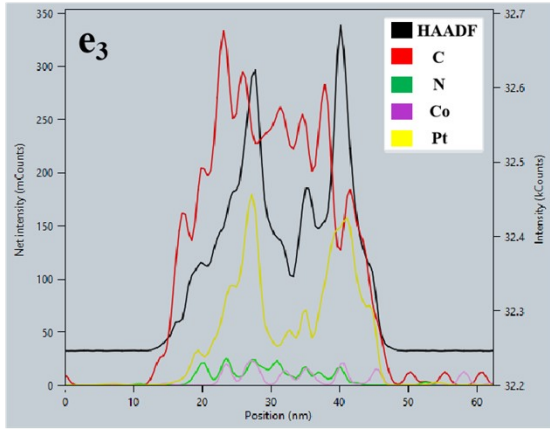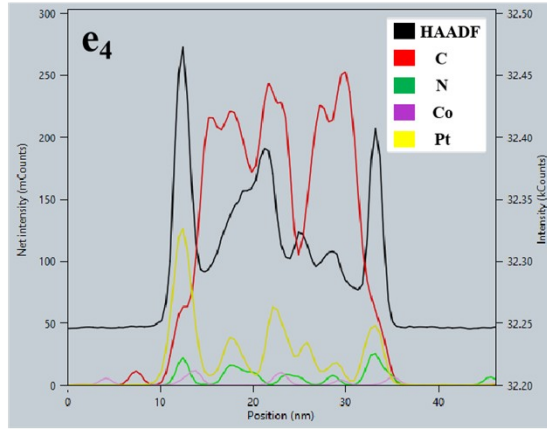

**Figure S3.** Structural and compositional characterizations of Pt<sub>3</sub>Co/N-CNT-U (a<sub>1</sub>-e<sub>1</sub>), Pt<sub>3</sub>Co/N-CNT-P (a<sub>2</sub>-e<sub>2</sub>), Pt<sub>3</sub>Co/N-CNT-T (a<sub>3</sub>-e<sub>3</sub>) and Pt<sub>3</sub>Co/N-CNT-H (a<sub>4</sub>-e<sub>4</sub>). a<sub>1-4</sub>) HRTEM; b<sub>1-4</sub>) HAADF-STEM images; c<sub>1-4</sub>), d<sub>1-4</sub>) EDX elemental mapping images; e<sub>1-4</sub>) Elemental surface scans of area in c<sub>1-4</sub>; The inset in (a<sub>1-4</sub>) is the enlarged HRTEM image of the selected area. The N, C, Co and Pt atoms are in green, red, purple and yellow colors, respectively.



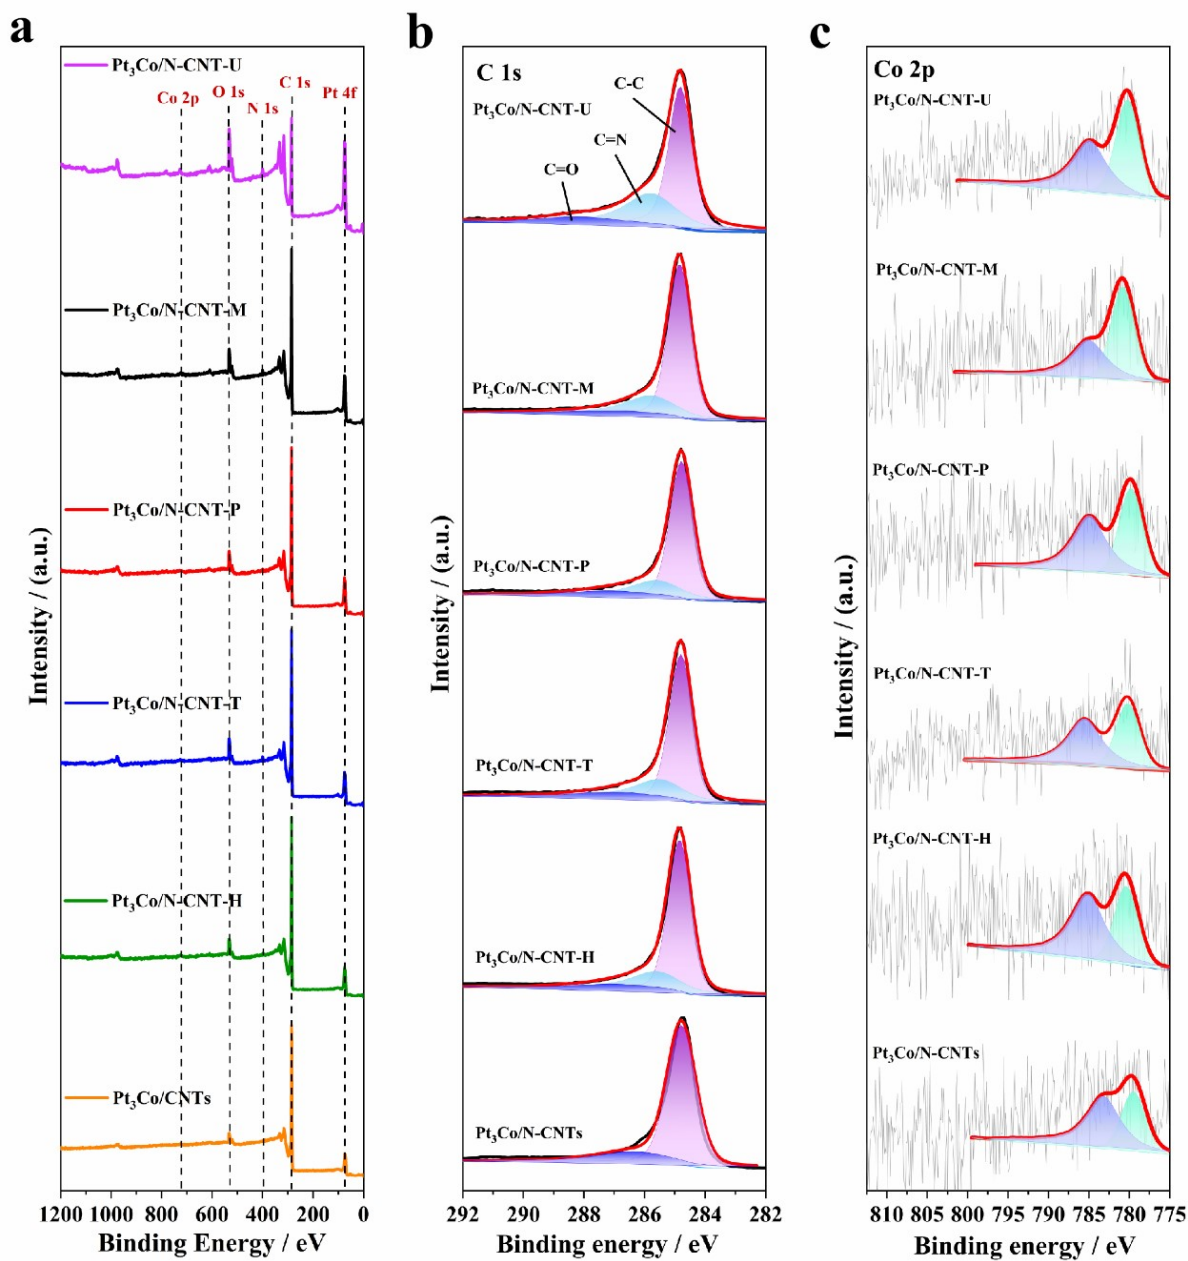

**Figure S4.** XPS patterns for a) survey; b) C 1s; c) Co 2p regions of Pt<sub>3</sub>Co/N-CNT-U, Pt<sub>3</sub>Co/N-CNT-M, Pt<sub>3</sub>Co/N-CNT-P, Pt<sub>3</sub>Co/N-CNT-T, Pt<sub>3</sub>Co/N-CNT-H, and Pt<sub>3</sub>Co/CNTs.

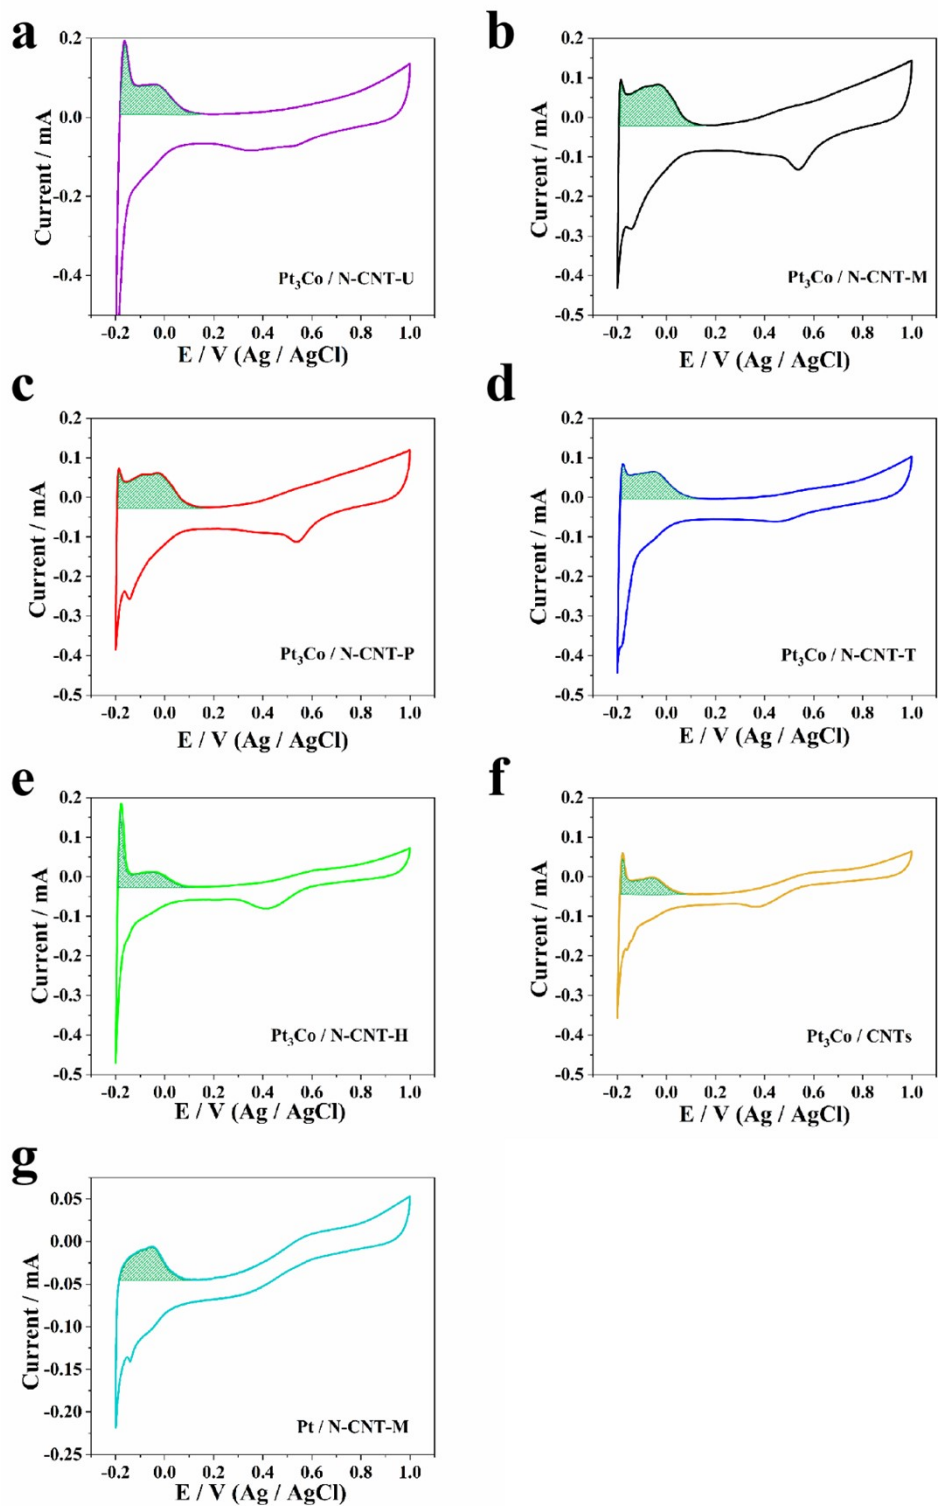

**Figure S5.** Hydrogen desorption domains of a)  $Pt_3Co/N-CNT-U$ ; b)  $Pt_3Co/N-CNT-M$ ; c)  $Pt_3Co/N-CNT-P$ ; d)  $Pt_3Co/N-CNT-T$ ; e)  $Pt_3Co/N-CNT-H$ ; f)  $Pt_3Co/CNTs$ , and g)  $Pt/N-CNT-M$ .



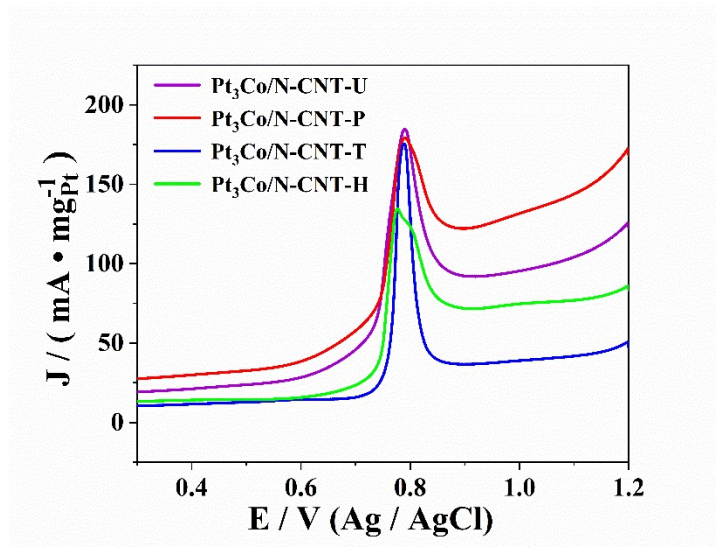

**Figure S6.** CO-stripping voltammograms of Pt<sub>3</sub>Co/N-CNT (U, P, T, H) at a scan rate of 50 mV s<sup>-1</sup> in 0.5 M H<sub>2</sub>SO<sub>4</sub>.

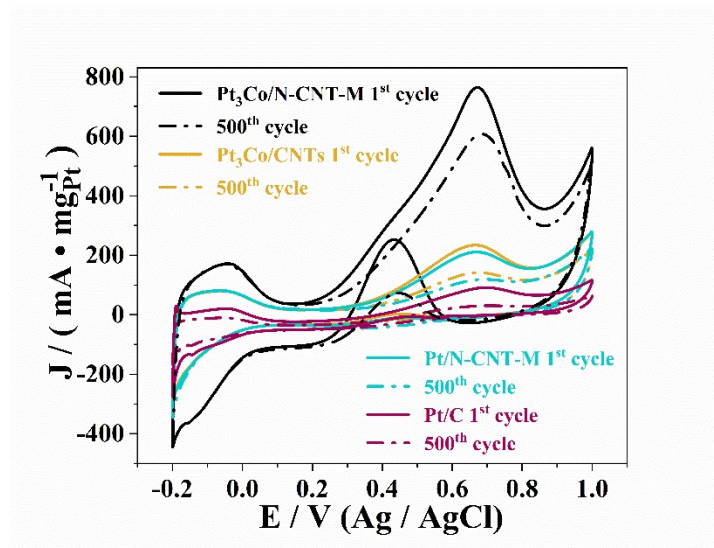

**Figure S7.** CVs of  $\text{Pt}_3\text{Co}/\text{N-CNT-M}$ ,  $\text{Pt}_3\text{Co}/\text{CNTs}$ ,  $\text{Pt}/\text{N-CNT-M}$ , and commercial  $\text{Pt}/\text{C}$  before and after 500 potential cycles.

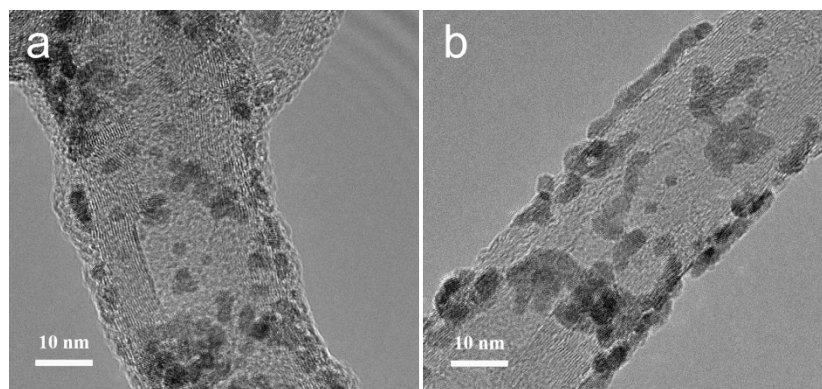

**Figure S8.** TEM images of the Pt<sub>3</sub>Co/N-CNT-M before (a) and after (b) durability test.

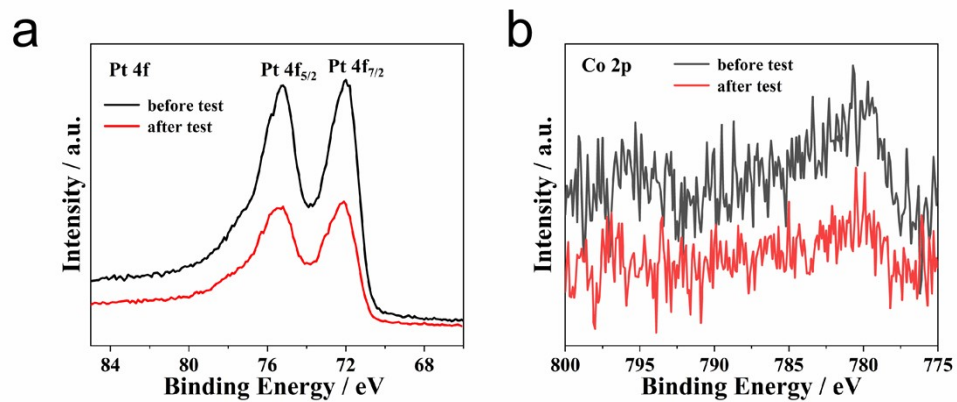

**Figure S9.** Comparison of XPS spectra of the Pt<sub>3</sub>Co/N-CNT-M before and after durability test.

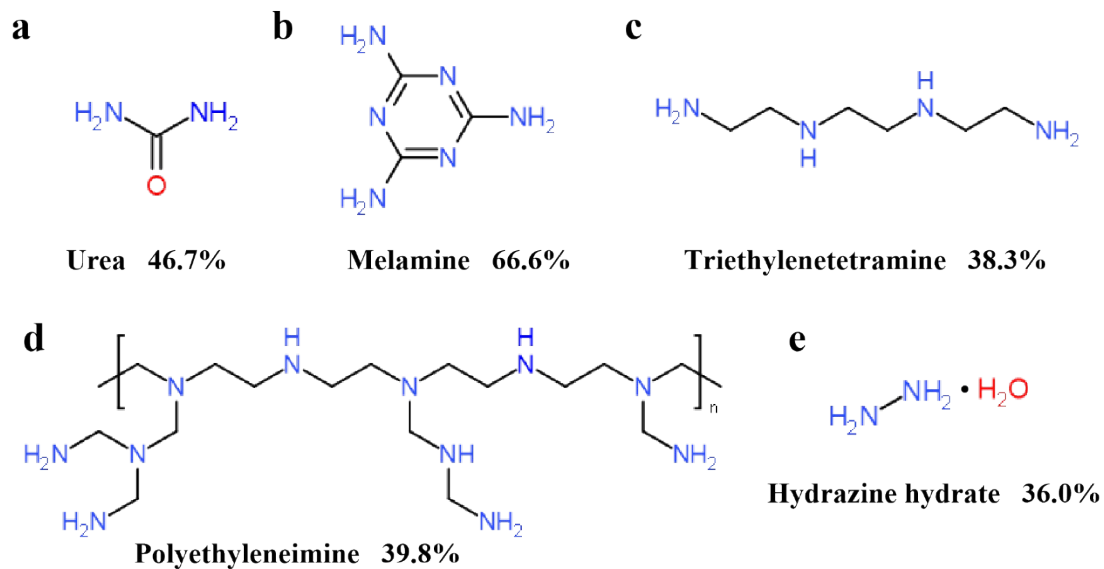

**Figure S10.** The structural formula and N content for a) urea; b) melamine; d) polyethyleneimine; c) triethylenetetramine; and e) hydrazine hydrate.



**Table S1.** TGA, Raman and ICP-OES results of Pt<sub>3</sub>Co NPs supported on N-CNT-U, N-CNT-M, N-CNT-P, N-CNT-T, N-CNT-H, and CNTs.

| Samples | N doping (wt%)    |                   | Pt <sub>3</sub> Co loading (wt%) | Decomposition temperature (°C) | Raman I <sub>D</sub> /I <sub>G</sub> | Pt:Co ratio by ICP-OES |
|---------|-------------------|-------------------|----------------------------------|--------------------------------|--------------------------------------|------------------------|
|         | <sup>a</sup>      | <sup>b</sup>      |                                  |                                |                                      |                        |
| N-CNT-U | <sup>a</sup> 1.14 | <sup>b</sup> 1.08 | 17.7                             | 380 ~ 545                      | 1.26                                 | 4.01:1                 |
| N-CNT-M | 1.21              | 1.19              | 18.7                             | 410 ~ 572                      | 1.35                                 | 3.92:1                 |
| N-CNT-P | 0.95              | 0.83              | 18.8                             | 410 ~ 575                      | 1.37                                 | 3.95:1                 |
| N-CNT-T | 0.62              | 0.60              | 14.5                             | 410 ~ 570                      | 1.31                                 | 3.86:1                 |
| N-CNT-H | 0.65              | 0.55              | 18.5                             | 410 ~ 610                      | 1.32                                 | 3.90:1                 |
| CNTs    | -                 |                   | 10.8                             | 280 ~ 550                      | 1.23                                 | 3.84:1                 |

<sup>a</sup> The TGA data.

<sup>b</sup> The elemental analysis test data.

**Table S2.** Surface areas, pore volumes and pore size distribution of N-CNT-U, N-CNT-M, N-CNT-P, N-CNT-T, N-CNT-H, and CNTs.

| Samples | SBET ( $\text{m}^2\cdot\text{g}^{-1}$ ) | $V_{\text{micro}}$ ( $\text{cm}^3\cdot\text{g}^{-1}$ ) | $V_{\text{meso}}$ ( $\text{cm}^3\cdot\text{g}^{-1}$ ) | $V_{\text{total}}$ ( $\text{cm}^3\cdot\text{g}^{-1}$ ) |
|---------|-----------------------------------------|--------------------------------------------------------|-------------------------------------------------------|--------------------------------------------------------|
| N-CNT-U | 141.1                                   | 0.003                                                  | 0.815                                                 | 0.818                                                  |
| N-CNT-M | 191.8                                   | 0.007                                                  | 0.764                                                 | 0.771                                                  |
| N-CNT-P | 194.2                                   | 0.012                                                  | 0.798                                                 | 0.810                                                  |
| N-CNT-T | 170.4                                   | 0.012                                                  | 0.778                                                 | 0.790                                                  |
| N-CNT-H | 227.2                                   | 0.010                                                  | 0.910                                                 | 0.920                                                  |
| CNTs    | 110.0                                   | 0.003                                                  | 0.680                                                 | 0.683                                                  |

**Table S3.** The amount of Pt<sup>0</sup> and Pt<sup>2+</sup> for Pt<sub>3</sub>Co/N-CNT (U, M, P, T, H), and Pt<sub>3</sub>Co/CNTs.

| Samples                    | Pt <sup>0</sup> (%) | Pt <sup>2+</sup> (%) |
|----------------------------|---------------------|----------------------|
| Pt <sub>3</sub> Co/N-CNT-U | 70.9                | 29.1                 |
| Pt <sub>3</sub> Co/N-CNT-M | 74.5                | 25.5                 |
| Pt <sub>3</sub> Co/N-CNT-P | 70.6                | 29.4                 |
| Pt <sub>3</sub> Co/N-CNT-T | 69.5                | 30.5                 |
| Pt <sub>3</sub> Co/N-CNT-H | 69.4                | 30.6                 |
| Pt <sub>3</sub> Co/CNTs    | 65.9                | 34.1                 |

**Table S4.** ECSA, Current density,  $I_f/I_b$ , Initial potential, Mass and Specific activity of Pt<sub>3</sub>Co/N-CNT (U, M, P, T, H), Pt<sub>3</sub>Co/CNTs, and Pt/N-CNT-M.

| Samples                    | ECSA<br>(m <sup>2</sup> •g <sup>-1</sup> ) | Current<br>density<br>(mA•mg <sup>-1</sup> Pt) | $I_f/I_b$ | Initial<br>potential<br>(eV) | Mass activity<br>(mA•mg <sup>-1</sup> Pt) | Specific<br>activity<br>(mA•cm <sup>-2</sup> ) |
|----------------------------|--------------------------------------------|------------------------------------------------|-----------|------------------------------|-------------------------------------------|------------------------------------------------|
| Pt <sub>3</sub> Co/N-CNT-U | 183.46                                     | 742.2                                          | 1.46      | 0.23                         | 742.2                                     | 5.91                                           |
| Pt <sub>3</sub> Co/N-CNT-M | 213.17                                     | 767.8                                          | 2.95      | 0.20                         | 767.8                                     | 6.11                                           |
| Pt <sub>3</sub> Co/N-CNT-P | 183.78                                     | 528.2                                          | 1.80      | 0.23                         | 528.2                                     | 4.20                                           |
| Pt <sub>3</sub> Co/N-CNT-T | 132.36                                     | 353.4                                          | 2.19      | 0.25                         | 353.4                                     | 2.81                                           |
| Pt <sub>3</sub> Co/N-CNT-H | 113.57                                     | 310.4                                          | 3.30      | 0.26                         | 310.4                                     | 2.47                                           |
| Pt <sub>3</sub> Co/CNTs    | 83.33                                      | 234.2                                          | -         | 0.38                         | 234.2                                     | 1.86                                           |
| Pt/N-CNT-M                 | 58.41                                      | 211.0                                          | -         | 0.37                         | 211.0                                     | 1.68                                           |
| Pt/C                       | -                                          | 91.4                                           | -         | 0.44                         | 91.4                                      | 0.73                                           |

**Table S5.** DFT calculated binding energies of Pt<sub>3</sub>Co on the surface of CNTs and N-CNT.

| <b>C</b>               | <b>Pt<sub>3</sub>Co</b> | <b>C-Pt<sub>3</sub>Co</b>  | <b>E<sub>ads</sub></b> |
|------------------------|-------------------------|----------------------------|------------------------|
| <b>-6.66419770E+02</b> | <b>-1.61955060E+01</b>  | <b>-6.83250090E+02</b>     | <b>-6.34814000E-01</b> |
| <b>CN</b>              | <b>Pt<sub>3</sub>Co</b> | <b>CN-Pt<sub>3</sub>Co</b> | <b>E<sub>ads</sub></b> |
| <b>-6.41212860E+02</b> | <b>-1.61955060E+01</b>  | <b>-6.63242610E+02</b>     | <b>-5.83424400E+00</b> |

**Table S6.** Calculated Gibbs free energies (eV) of intermediates on Pt (111) surface for MOR.

| Intermediates       | VASP     | Free energy correction | Corrected energy | Real free energy | $\Delta G$ | Relative G |
|---------------------|----------|------------------------|------------------|------------------|------------|------------|
| CH <sub>3</sub> OH* | -438.231 | 1.254                  | -436.977         | -451.197         | -          | 0.000      |
| CH <sub>2</sub> OH* | -434.694 | 0.993                  | -433.701         | -451.321         | -0.124     | -0.124     |
| CHOH*               | -430.734 | 0.730                  | -430.004         | -451.024         | 0.297      | 0.173      |
| COH*                | -427.483 | 0.363                  | -427.119         | -451.539         | -0.515     | -0.342     |
| CO*                 | -424.088 | 0.131                  | -423.957         | -451.777         | -0.238     | -0.580     |
| CO*+OH*             | -434.196 | 0.390                  | -433.806         | -450.806         | 0.971      | 0.391      |
| CO <sub>2</sub>     | -430.309 | -0.257                 | -430.567         | -450.967         | -0.161     | 0.230      |

**Table S7.** Calculated Gibbs free energies (eV) of intermediates on Pt<sub>3</sub>Co (111) surface for MOR.

| Intermediates       | VASP     | Free energy correction | Corrected energy | Real free energy | $\Delta G$ | Relative G |
|---------------------|----------|------------------------|------------------|------------------|------------|------------|
| CH <sub>3</sub> OH* | -453.030 | 1.268                  | -451.762         | -465.982         | -          | 0.000      |
| CH <sub>2</sub> OH* | -448.588 | 1.044                  | -447.544         | -465.164         | 0.819      | 0.819      |
| CHOH*               | -445.000 | 0.747                  | -444.253         | -465.273         | -0.109     | 0.709      |
| COH*                | -441.285 | 0.421                  | -440.864         | -465.284         | -0.011     | 0.698      |
| CO*                 | -438.454 | 0.120                  | -438.334         | -466.154         | -0.870     | -0.171     |
| CO*+OH*             | -449.025 | 0.438                  | -448.587         | -465.587         | 0.566      | 0.395      |
| CO <sub>2</sub>     | -444.748 | -0.257                 | -445.005         | -465.405         | 0.182      | 0.577      |
